# Supplementary material for: Thermodynamics and high-pressure kinetics of a fast carbon dioxide fixation reaction by a (2,6-pyridinedicarboxamidato-hydroxo)nickel(ii) complex
Source: Royal Society of Chemistry journal article supplement (doi:10.1039/c3dt53004c), 2014-01-01
Supplement: c3dt53004c1.pdf [file c3dt53004c1.pdf]

Electronic Supplementary Information for Dalton Transactions

### Supplementary Data

Thermodynamics and High-Pressure Kinetics of a Fast Carbon Dioxide Fixation Reaction by a (2,6-Pyridinedicarboxamidato-hydroxo)nickel(II) Complex

O. Troeppner,<sup>a</sup> D. Huang<sup>b</sup>, R. H. Holm<sup>b</sup> and I. Ivanović-Burmazović<sup>a</sup>

<sup>a</sup> Department of Chemistry and Pharmacy, University of Erlangen-Nürnberg, Egerlandstr. 1 91058, Erlangen, Germany.

<sup>b</sup> Department of Chemistry and Chemical Biology, Harvard University, Cambridge, Massachusetts 02138, United States.

To whom correspondence should be adressed:

ivana.ivanovic-burmazovic@fau.de; [holm@chemistry.harvard.edu](mailto:holm@chemistry.harvard.edu)

**Table S1.****Rate Constants for the CO<sub>2</sub> Uptake ( $k_{on}$ ) and Decarboxylation ( $k_{off}$ ) at Elevated Pressures at 223 K.**

| $P$ [MPa]                                               | 0.5        | 20         | 35         | 70         |
|---------------------------------------------------------|------------|------------|------------|------------|
| $k_{on} \times 10^4$ (M <sup>-1</sup> s <sup>-1</sup> ) | 11.5 ± 1.0 | 14.1 ± 1.2 | 18.5 ± 0.7 | 25.6 ± 1.0 |
| $P$ [MPa]                                               | 0.1        | 10         | 40         | 70         |
| $k_{off} \times 10^{-3}$ (s <sup>-1</sup> )             | 8.8 ± 0.7  | 9.93 ± 0.6 | 10.6 ± 0.8 | 12.9 ± 0.8 |
